# Supplementary material for: The ULTRAPETALA1 Gene Functions Early in Arabidopsis Development to Restrict Shoot Apical Meristem Activity and Acts Through WUSCHEL to Regulate Floral Meristem Determinacy
Source: Oxford University Press journal article supplement (doi:10.1534/genetics.104.028787), 2004-08-01
Supplement: jfsupplemental_data.doc [file jfsupplemental_data.doc]

Supplemental Table. Floral organs produced by *stm-2* plants and *ult1 stm* double mutant plants.

Mean number per flower

Organ type *ult1-1 stm-11* *ult1-2 stm-11* *stm-2* *ult1-1 stm-2*

sepal 3.89+/-0.10 3.80+/-0.35 3.44+/-0.11 4.08+/-0.07

petal 1.04+/-0.16 0.73+/-0.33 0.74+/-0.15 2.40+/-0.13

petal mosaic* 0.44+/-0.09 0.07+/-0.06 0.07+/-0.06 0.14+/-0.04

stamen 2.05+/-0.16 1.40+/-0.27 3.07+/-0.18 4.17+/-0.12

fused stamen# 0.31+/-0.10 0.13+/-0.13 0.51+/-0.15 0.18+/-0.07

stamen mosaic$ 0.17+/-0.07 0.13+/-0.09 0.02+/-0.01 0.10+/-0.03

carpel-like** 0.25+/-0.08 0.13+/-0.13 0.13+/-0.05 0.82+/-0.09

total 8.17+/-0.31 6.40+/-0.77 8.00+/-0.29 11.9+/-0.30

A total of 64 flowers on 12 *ult1-1 stm-11* plants, 15 flowers on 6 *ult1-2 stm-11* plants, 43 flowers on 10 *stm-2* plants and 78 flowers on 10 *ult1-1 stm-2* plants were counted. All plants formed multiple meristems, and flowers were only counted on the single most developed inflorescence. The fused flowers that terminate the inflorescence meristem were not included. Values represent the mean number of floral organs plus or minus the standard error of the mean.

*Includes petal/sepal, petal/stamen and petal/sepal/stamen mosaic organs.

#Includes stamens whose filament was fused with that of an adjacent stamen.

$Includes stamen/sepal and stamen/carpel mosaics.

**Organs positioned in the center of the flower, bearing stigmatic tissue and/or ovules. None of these organs fused to form a normal gynoecium.

Supplemental Figure. Scanning electron micrographs of single and double mutant floral meristems. (A) SEM of an *stm-2* stage 2 floral meristem. (B) SEM of an *ult1-1 stm-2* stage 2 floral meristem, which is indistinguishable from a stage 2 *stm-2* floral meristem at this stage of development. (C) SEM of an *stm-2* stage 3 floral meristem with a very reduced apex between the four sepal primordia. (D) SEM of an *ult1-1 stm-2* stage 3 floral meristem with a larger dome of uncommitted meristematic cells between the four sepal primordia. (E) SEM of a *wus-1* stage 2 floral meristem. (F) SEM of an *ult1-1 wus-1* stage 2 floral meristem, which is indistinguishable from a *wus-1* stage 2floral meristem at this stage of development. (G) SEM of a *wus-1* stage 3 floral meristem with a flat apex between the four sepal primordia. (H) SEM of an *ult1-1 wus-1* stage 3 floral meristem with a flat apex between the four sepal primordia, similar to *wus-1* single mutants. Scale bars, 20 m.
